# Supplementary material
Source: publisher figshare collection journal article supplement (https://acs.figshare.com/ndownloader/files/24173579)
Supplement: Supplementary file 1 [file 24173579]

# Supporting Information

## Biophenol-Mediated Solvent-free Synthesis of Titanium Silicalite-1 to Improve the Acidity Character of Framework Ti toward Catalysis Application

*Lu Wang,<sup>a</sup> Yan Xu,<sup>a</sup> Guanzhong Zhai,<sup>a</sup> Yanmei Zheng,<sup>a</sup> Jiale Huang,<sup>a</sup> Daohua Sun,<sup>a\*</sup>*

*Qingbiao Li<sup>a,b</sup>*

<sup>a</sup> Department of Chemical and Biochemical Engineering, College of Chemistry and Chemical Engineering, Xiamen University. No. 422, Siming South Road, Xiamen, Fujian, China 361005.

<sup>b</sup> College of Food and Biological Engineering, Jimei University. No. 185, Yinjiang Road, Xiamen, China 361021.

*\* Corresponding author.*

*Dr. Daohua Sun*

*E-mail address: sdaohua@xmu.edu.cn.*

**Supporting Information** contains 4 pages, 4 Figures, 1 Table.

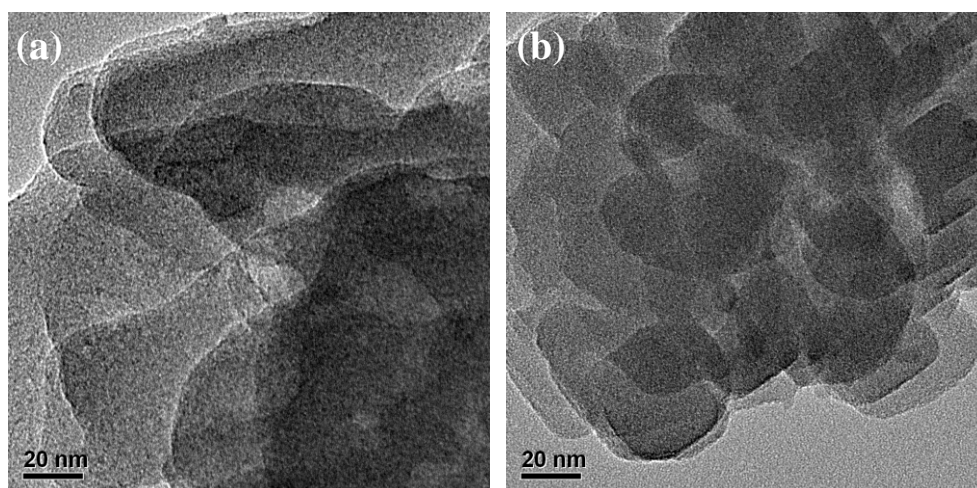

**Fig. S1** HR-TEM images of (a) TS-1 and (b) bio-TS-1.

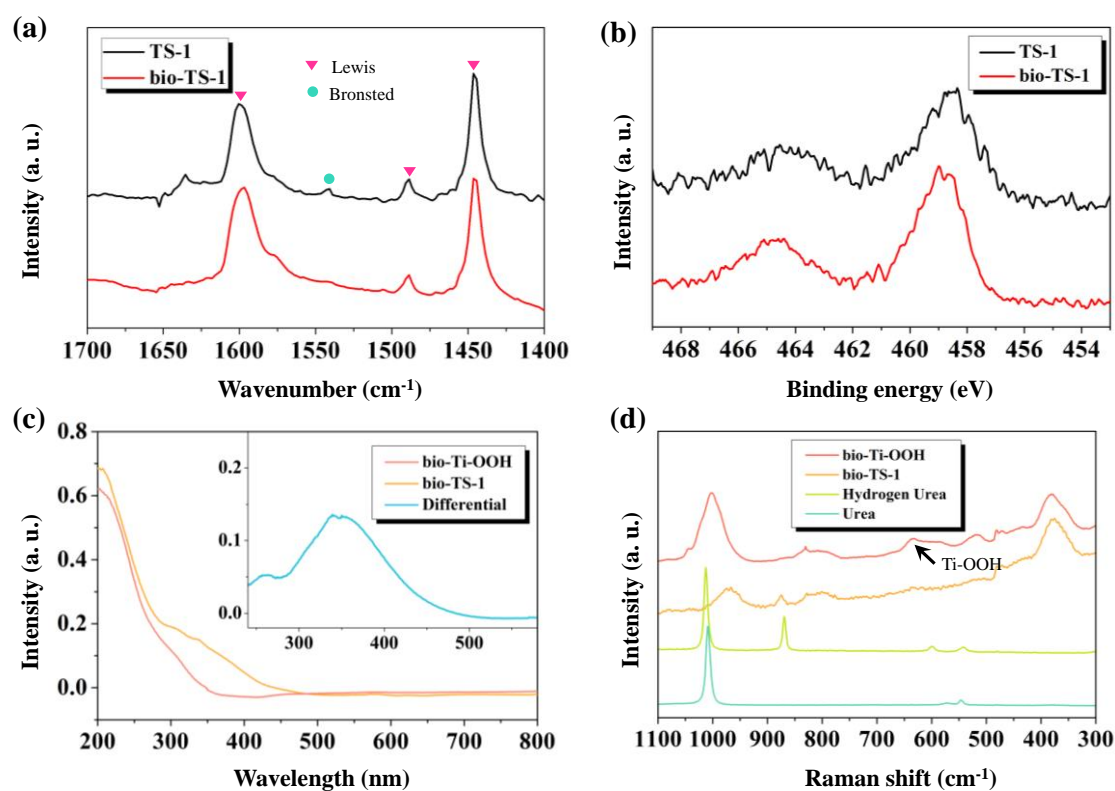

**Figure S2.** (a) pyridine absorption IR spectra and (b) XPS Ti 2p core-level spectra of bio-TS-1 and TS-1; (c) DR UV spectra and (d) Raman spectra of bio-TS-1 reacting with HOOH.

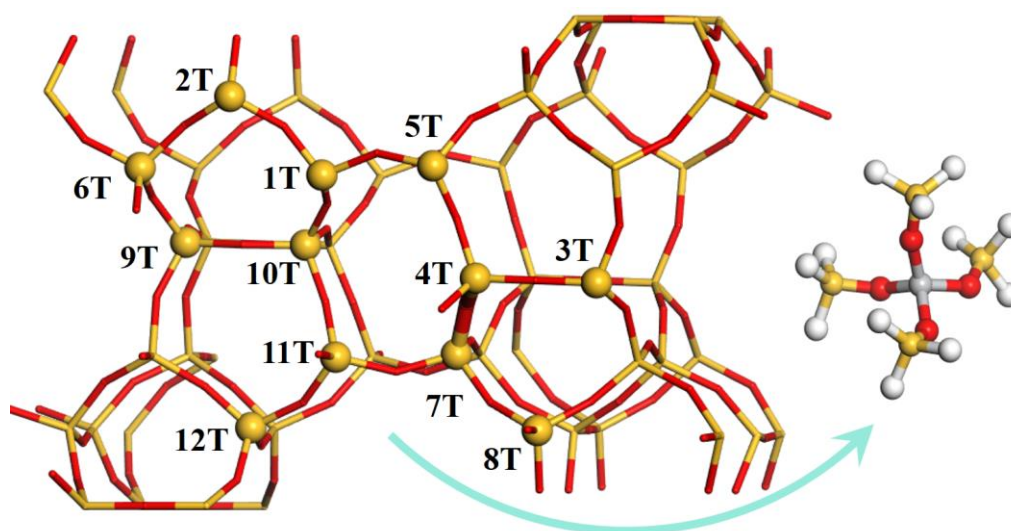

**Figure S3.** MFI framework in wire-mesh format with 12 crystallographically independent T sites as labeled in ball format (straight view). Mono-substitution 5T tetrahedron model as extracted from the framework. Color mode: Ti atom: grey ball, Si atoms: yellow balls and wires, O atoms: red balls and wires, H atoms: white balls.

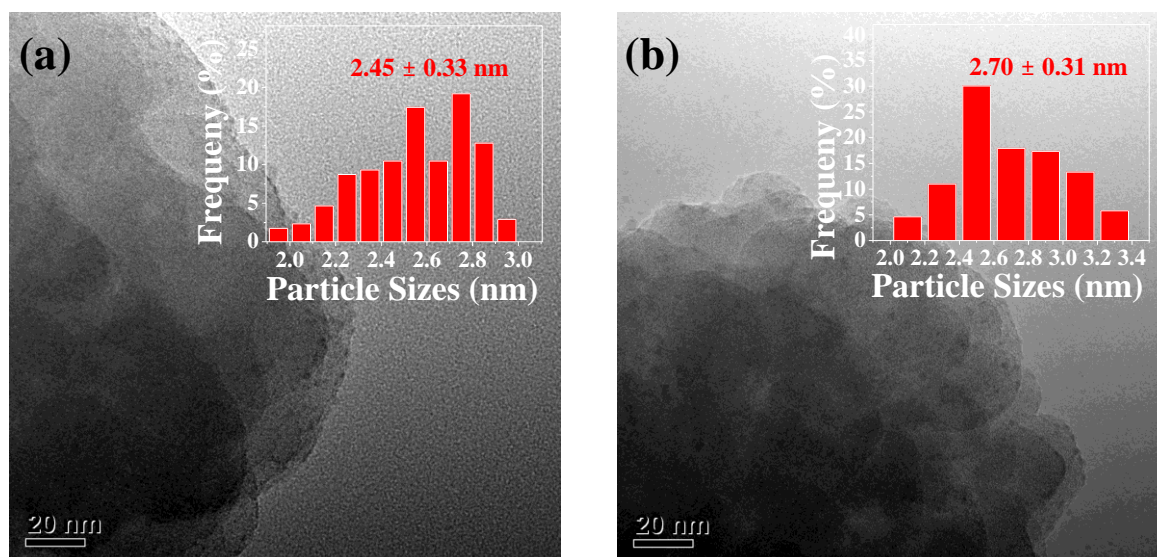

**Figure S4.** HR-TEM images of (a) Au/TS-1 and (b) Au/bio-TS-1 (inset: size-distribution of Au NPs; Au loading 0.5wt%).

**Table** Textural properties of bio-TS-1 and TS-1

| Sample   | $S_{\text{BET}}^{\text{a}}$<br>$\text{m}^2/\text{g}$ | $S_{\text{micro}}^{\text{b}}$<br>$\text{m}^2/\text{g}$ | $S_{\text{ext}}^{\text{b}}$<br>$\text{m}^2/\text{g}$ | $V_{\text{total}}^{\text{a}}$<br>$\text{cm}^3/\text{g}$ | $V_{\text{meso}}^{\text{c}}$<br>$\text{cm}^3/\text{g}$ | $V_{\text{micro}}^{\text{b}}$<br>$\text{cm}^3/\text{g}$ |
|----------|------------------------------------------------------|--------------------------------------------------------|------------------------------------------------------|---------------------------------------------------------|--------------------------------------------------------|---------------------------------------------------------|
| bio-TS-1 | 453                                                  | 194                                                    | 259                                                  | 0.27                                                    | 0.13                                                   | 0.083                                                   |
| TS-1     | 440                                                  | 202                                                    | 238                                                  | 0.25                                                    | 0.11                                                   | 0.086                                                   |

<sup>a</sup>  $S_{\text{BET}}$  was calculated using BET method.  $V_{\text{total}}$  was evaluated from the adsorption isotherm at relative pressure about 0.99.

<sup>b</sup>  $S_{\text{ext}}$ ,  $S_{\text{micro}}$  and  $V_{\text{micro}}$  were calculated using t-plot method.

<sup>b</sup>  $V_{\text{Meso}}$  were calculated using BJH method (from adsorption branch).
